# Supplementary material
Source: publisher figshare collection journal article supplement (https://tandf.figshare.com/ndownloader/files/15341789)
Supplement: Supplementary file 1 [file 15341789]

**Supplemental Material**

Table A1: Variable definitions

| **Variable** | **Definition** |
| --- | --- |
| Sales () | Total sales in a year, at the firm level. |
| Total assets () | Total assets in a year, at the firm level. |
| R&D intensity () | R&D expenses per capita in a year, at the firm level, in logs. |
| R&D expenses () | R&D expenses in a year, at the firm level, in logs. |
| New product ratio () | Output of new product relative to total output at the firm level, in a year. |
| New product amount () | Output of new product in a year, at the firm level, in logs. |
| Firm size () | The average number of employees per year in a firm, in logs. |
| Capital intensity () | Total assets, in thousands of RMB, relative to the average number of employees in a firm, by using ‘winsor’ command in Stata at 1st and 99th percentiles. |
|  |
| Export intensity () | Total revenues from export, relative to total sales of the firm, by using ‘winsor’ command in Stata at 1st and 99th percentiles. |
|  |
| Firm age () | Firm age, in logs, by using ‘winsor’ command in Stata at 1st and 99th percentiles. |
| Advertisement intensity () | Total advertisement expenses relative to total employees in a firm, by using ‘winsor’ command in Stata at 1st and 99th percentiles, in logs. |
|  |
| State-owned enterprise () | If a firm is a state-owned enterprise, the variable is equal to 1, otherwise it is 0. |
| Herfindahl–Hirschman index () | *=*, where industry *m* is defined at 3-digit level. |

Table A2: Summary statistics

| Variable | Obs. | Mean | Std. Dev. | Minimum | Median | Maximum |
| --- | --- | --- | --- | --- | --- | --- |
| **Panel A: Innovation indicators** | | | | | | |
|  | 41,049 | 0.098 | 0.399 | 0.000 | 0.000 | 2.793 |
|  | 41,047 | 0.568 | 1.824 | 0.000 | 0.000 | 14.548 |
|  | 41,049 | 0.024 | 0.125 | 0.000 | 0.000 | 1.000 |
|  | 41,049 | 0.591 | 2.418 | 0.000 | 0.000 | 17.640 |
| **Panel B: Control variables** | | | | | | |
| **Panel B-1: Spatial lag of innovation indicators (spatial lag of Y)** | | | | | | |
|  | 41,049 | 10.296 | 35.868 | 1.970 | 7.660 | 2724.376 |
|  | 41,049 | 57.570 | 129.816 | 12.500 | 45.877 | 9914.351 |
|  | 41,049 | 2.927 | 5.196 | 0.660 | 2.052 | 354.786 |
|  | 41,049 | 73.772 | 172.096 | 15.926 | 52.221 | 15046.066 |
| **Panel B-2: Firm-level FDI measures** | | | | | | |
| *(employee)* | 41,049 | 0.001 | 0.011 | 0.000 | 0.000 | 0.604 |
| *(sales)* | 41,049 | 0.001 | 0.013 | 0.000 | 0.000 | 0.852 |
| *(assets)* | 41,049 | 0.001 | 0.014 | 0.000 | 0.000 | 0.860 |
| *(employee)* | 41,049 | 0.001 | 0.025 | 0.000 | 0.000 | 1.000 |
| *(sales)* | 41,049 | 0.001 | 0.026 | 0.000 | 0.000 | 1.000 |
| *(assets)* | 41,049 | 0.001 | 0.027 | 0.000 | 0.000 | 1.000 |
| **Panel B-3: Firm, sector, and region characteristics** | | | | | | |
|  | 41,049 | 4.833 | 1.078 | 2.079 | 4.718 | 10.519 |
|  | 41,049 | 3.871 | 1.151 | -0.025 | 3.909 | 6.539 |
|  | 41,049 | 0.128 | 0.295 | 0.000 | 0.000 | 1.000 |
|  | 41,049 | 1.881 | 0.746 | 0.000 | 1.792 | 3.932 |
|  | 41,049 | 0.270 | 0.444 | 0.000 | 0.000 | 1.000 |
|  | 41,049 | 0.007 | 0.011 | 0.001 | 0.004 | 0.300 |
|  | 41,049 | 0.039 | 0.094 | 0.000 | 0.000 | 1.000 |
| **Panel C: Firm-level FDI spillover measures (spatial lag of X)** | | | | | | |
| *(employee)* | 41,049 | 0.136 | 0.845 | 0.028 | 0.100 | 155.652 |
| *(sales)* | 41,049 | 0.152 | 2.090 | 0.025 | 0.105 | 307.843 |
| *(assets)* | 41,049 | 0.157 | 0.757 | 0.031 | 0.115 | 120.115 |
| *(employee)* | 41,049 | 0.133 | 0.240 | 0.021 | 0.087 | 18.464 |
| *(sales)* | 41,049 | 0.136 | 0.235 | 0.022 | 0.089 | 16.081 |
| *(assets)* | 41,049 | 0.144 | 0.271 | 0.023 | 0.093 | 23.592 |

Notes: (1) The dataset is over 2002–2007. (2) Panel B-1 and Panel C display the spatial lagged variables with non-truncated distance weight matrices.

Table A3: The impacts of IFDI and OFDI spatial spillovers on innovation input (2)

| Variable | Dependent variable: | | | | | |
| --- | --- | --- | --- | --- | --- | --- |
|  | Panel A: No truncated | | | Panel B: 100km | | |
|  | A-1 | A-2 | A-3 | B-1 | B-2 | B-3 |
|  | Employee | Sales | Assets | Employee | Sales | Assets |
|  | 0.3994*** | 0.3995*** | 0.3993*** | 0.3994*** | 0.3995*** | 0.3993*** |
|  | (0.0194) | (0.0194) | (0.0194) | (0.0194) | (0.0194) | (0.0194) |
|  | 0.0003 | 0.0003 | 0.0003 | 0.0003* | 0.0003 | 0.0003* |
|  | (0.0002) | (0.0002) | (0.0002) | (0.0002) | (0.0002) | (0.0002) |
|  | 2.4032* | 2.7272* | 3.4548*** | 2.4002* | 2.7227* | 3.4518*** |
|  | (1.3812) | (1.3971) | (1.2308) | (1.3807) | (1.3964) | (1.2301) |
|  | 2.0589*** | 2.1278*** | 1.6405*** | 2.0582*** | 2.1271*** | 1.6400*** |
|  | (0.6647) | (0.6695) | (0.6317) | (0.6646) | (0.6694) | (0.6316) |
|  | 0.0442*** | 0.0193*** | 0.0570*** | 0.0443*** | 0.0194*** | 0.0573*** |
|  | (0.0024) | (0.0005) | (0.0027) | (0.0023) | (0.0005) | (0.0027) |
|  | 0.1466*** | 0.1323*** | 0.1209*** | 0.1471*** | 0.1335*** | 0.1226*** |
|  | (0.0474) | (0.0507) | (0.0403) | (0.0470) | (0.0502) | (0.0402) |
|  | 0.2829*** | 0.2823*** | 0.2806*** | 0.2827*** | 0.2822*** | 0.2804*** |
|  | (0.0135) | (0.0134) | (0.0134) | (0.0135) | (0.0134) | (0.0134) |
|  | 0.0938*** | 0.0922*** | 0.0910*** | 0.0939*** | 0.0922*** | 0.0910*** |
|  | (0.0083) | (0.0083) | (0.0082) | (0.0083) | (0.0083) | (0.0082) |
|  | -0.1116*** | -0.1087*** | -0.1103*** | -0.1122*** | -0.1093*** | -0.1110*** |
|  | (0.0263) | (0.0263) | (0.0262) | (0.0264) | (0.0263) | (0.0262) |
|  | 0.0928*** | 0.0933*** | 0.0921*** | 0.0927*** | 0.0932*** | 0.0919*** |
|  | (0.0139) | (0.0139) | (0.0139) | (0.0139) | (0.0139) | (0.0139) |
|  | 0.2163*** | 0.2169*** | 0.2178*** | 0.2165*** | 0.2171*** | 0.2180*** |
|  | (0.0210) | (0.0211) | (0.0210) | (0.0210) | (0.0211) | (0.0210) |
|  | 3.9590*** | 3.9553*** | 3.9496*** | 3.9594*** | 3.9546*** | 3.9494*** |
|  | (0.9758) | (0.9734) | (0.9723) | (0.9759) | (0.9735) | (0.9724) |
|  | 0.0814 | 0.0822 | 0.0840 | 0.0813 | 0.0820 | 0.0837 |
|  | (0.0726) | (0.0726) | (0.0727) | (0.0726) | (0.0726) | (0.0727) |
| *Firm dummy* | Yes | Yes | Yes | Yes | Yes | Yes |
| *Year dummy* | Yes | Yes | Yes | Yes | Yes | Yes |
| Number of observations | 41,046 | 41,046 | 41,046 | 41,046 | 41,046 | 41,046 |
| Number of firms | 20,965 | 20,965 | 20,965 | 20,965 | 20,965 | 20,965 |

Notes: (1) Employee, sales, and total assets are employed to capture the spatial spillovers, respectively. (2) The inverse-haversine distance matrices of non-truncated and truncated forms at 100 km are used in Panels A and B, respectively. (3) ***, **, and * indicate statistical significance at the 1%, 5%, and 10% levels, respectively. (4) Robust standard errors are in parentheses.

Table A4: The impacts of one-period lagged IFDI and OFDI spatial spillovers on innovation input

| Variable | Dependent variable: | | | | | |
| --- | --- | --- | --- | --- | --- | --- |
|  | Panel A: No truncated | | | Panel B: 100km | | |
|  | A-1 | A-2 | A-3 | B-1 | B-2 | B-3 |
|  | Employee | Sales | Assets | Employee | Sales | Assets |
|  | 0.5234*** | 0.5240*** | 0.5238*** | 0.5234*** | 0.5239*** | 0.5238*** |
|  | (0.0258) | (0.0258) | (0.0258) | (0.0258) | (0.0258) | (0.0258) |
|  | 0.0002* | 0.0002* | 0.0002* | 0.0002* | 0.0002* | 0.0002* |
|  | (0.0001) | (0.0001) | (0.0001) | (0.0001) | (0.0001) | (0.0001) |
|  | 0.0744 | 0.2265 | 0.2987 | 0.0740 | 0.2259 | 0.2983 |
|  | (0.2319) | (0.2328) | (0.2283) | (0.2318) | (0.2328) | (0.2282) |
|  | 0.2581* | 0.2540* | 0.2565** | 0.2580* | 0.2539* | 0.2565** |
|  | (0.1397) | (0.1432) | (0.1293) | (0.1396) | (0.1432) | (0.1293) |
|  | 0.0031*** | 0.0026*** | 0.0063*** | 0.0032*** | 0.0026*** | 0.0063*** |
|  | (0.0010) | (0.0003) | (0.0017) | (0.0010) | (0.0003) | (0.0017) |
|  | 0.0222* | 0.0251** | 0.0164 | 0.0226* | 0.0256** | 0.0168 |
|  | (0.0116) | (0.0108) | (0.0103) | (0.0116) | (0.0108) | (0.0104) |
|  | 0.0291*** | 0.0287*** | 0.0284*** | 0.0291*** | 0.0287*** | 0.0284*** |
|  | (0.0025) | (0.0024) | (0.0024) | (0.0025) | (0.0024) | (0.0024) |
|  | 0.0167*** | 0.0165*** | 0.0163*** | 0.0167*** | 0.0165*** | 0.0164*** |
|  | (0.0019) | (0.0019) | (0.0019) | (0.0019) | (0.0019) | (0.0019) |
|  | -0.0176*** | -0.0178*** | -0.0177*** | -0.0177*** | -0.0179*** | -0.0178*** |
|  | (0.0056) | (0.0056) | (0.0056) | (0.0056) | (0.0056) | (0.0056) |
|  | 0.0117*** | 0.0116*** | 0.0116*** | 0.0117*** | 0.0115*** | 0.0116*** |
|  | (0.0029) | (0.0029) | (0.0029) | (0.0029) | (0.0029) | (0.0029) |
|  | 0.0371*** | 0.0373*** | 0.0374*** | 0.0371*** | 0.0373*** | 0.0374*** |
|  | (0.0047) | (0.0047) | (0.0047) | (0.0047) | (0.0047) | (0.0047) |
|  | 0.8295*** | 0.8265*** | 0.8251*** | 0.8294*** | 0.8264*** | 0.8250*** |
|  | (0.2024) | (0.2019) | (0.2019) | (0.2024) | (0.2019) | (0.2019) |
|  | 0.0146 | 0.0148 | 0.0150 | 0.0146 | 0.0148 | 0.0150 |
|  | (0.0160) | (0.0159) | (0.0160) | (0.0160) | (0.0159) | (0.0160) |
| *Firm dummy* | Yes | Yes | Yes | Yes | Yes | Yes |
| *Year dummy* | Yes | Yes | Yes | Yes | Yes | Yes |
| Number of observations | 41,049 | 41,049 | 41,049 | 41,049 | 41,049 | 41,049 |
| Number of firms | 20,965 | 20,965 | 20,965 | 20,965 | 20,965 | 20,965 |

Notes: (1) Employee, sales, and total assets are employed to capture the spatial spillovers, respectively. (2) , , , and are one-period lagged items. (3) The inverse-haversine distance matrices of non-truncated and truncated forms at 100 km are used in Panels A and B, respectively. (4) ***, **, and * indicate statistical significance at the 1%, 5%, and 10% levels, respectively. (5) Robust standard errors are in parentheses.

Table A5: The impacts of IFDI and OFDI spatial spillovers on innovation input based on different truncated matrices

| Variable | Dependent variable: | | | | |
| --- | --- | --- | --- | --- | --- |
|  | (1) | (2) | (3) | (4) | (5) |
|  | 600 km | 550 km | 500 km | 450 km | 400 km |
|  | 0.0119*** | 0.0119*** | 0.0119*** | 0.0119*** | 0.0119*** |
|  | (0.0009) | (0.0009) | (0.0009) | (0.0009) | (0.0009) |
|  | 0.0226** | 0.0226** | 0.0226** | 0.0225** | 0.0224** |
|  | (0.0092) | (0.0093) | (0.0093) | (0.0092) | (0.0092) |
|  | (6) | (7) | (8) | (9) | (10) |
|  | 350 km | 300 km | 250 km | 200 km | 150 km |
|  | 0.0118*** | 0.0118*** | 0.0118*** | 0.0118*** | 0.0119*** |
|  | (0.0009) | (0.0009) | (0.0009) | (0.0009) | (0.0009) |
|  | 0.0220** | 0.0215** | 0.0207** | 0.0214** | 0.0221** |
|  | (0.0091) | (0.0090) | (0.0089) | (0.0090) | (0.0091) |
|  | (11) | (12) | (13) | (14) | (15) |
|  | 100 km | 75 km | 50 km | 25 km | 10 km |
|  | 0.0119*** | 0.0119*** | 0.0120*** | 0.0121*** | 0.0121*** |
|  | (0.0009) | (0.0008) | (0.0008) | (0.0007) | (0.0007) |
|  | 0.0237** | 0.0236** | 0.0252*** | 0.0275*** | 0.0268*** |
|  | (0.0094) | (0.0094) | (0.0097) | (0.0103) | (0.0103) |

Notes: (1) Employee is employed to capture the spatial spillovers in all specifications. (2) The inverse-haversine distance matrices of truncated forms are from 600 km to 10 km, respectively. (3) ***, **, and * indicate statistical significance at the 1%, 5%, and 10% levels, respectively. (4) Robust standard errors are in parentheses. (5) Other control variables are omitted in the table.

Table A6: The results of placebo test 1 (randomly selected fictitious I(O)FDI firms)

| Variable | Dependent variable: | | | | | |
| --- | --- | --- | --- | --- | --- | --- |
|  | Panel A: No truncated | | | Panel B: 100km | | |
|  | A-1 | A-2 | A-3 | B-1 | B-2 | B-3 |
|  | Employee | Sales | Assets | Employee | Sales | Assets |
|  | 0.5238*** | 0.5238*** | 0.5236*** | 0.5237*** | 0.5238*** | 0.5235*** |
|  | (0.0259) | (0.0259) | (0.0259) | (0.0259) | (0.0259) | (0.0259) |
|  | 0.0002* | 0.0002 | 0.0002 | 0.0002* | 0.0002 | 0.0002 |
|  | (0.0001) | (0.0001) | (0.0001) | (0.0001) | (0.0001) | (0.0001) |
|  | 0.2387 | 0.2593 | 0.2893 | 0.2379 | 0.2569 | 0.2877 |
|  | (0.2308) | (0.1874) | (0.2313) | (0.2306) | (0.1872) | (0.2312) |
|  | -0.0051 | -0.0493 | -0.0115 | -0.0051 | -0.0493 | -0.0115 |
|  | (0.0357) | (0.0686) | (0.1145) | (0.0357) | (0.0686) | (0.1145) |
|  | 0.0006 | 0.0001 | 0.0001 | 0.0006 | 0.0001 | 0.0001 |
|  | (0.0005) | (0.0001) | (0.0001) | (0.0005) | (0.0001) | (0.0001) |
|  | 0.0011 | 0.0000 | 0.0000 | 0.0011 | 0.0000 | 0.0000 |
|  | (0.0012) | (0.0003) | (0.0000) | (0.0013) | (0.0003) | (0.0000) |
|  | 0.0294*** | 0.0293*** | 0.0292*** | 0.0293*** | 0.0293*** | 0.0292*** |
|  | (0.0025) | (0.0025) | (0.0025) | (0.0025) | (0.0025) | (0.0025) |
|  | 0.0169*** | 0.0168*** | 0.0167*** | 0.0169*** | 0.0168*** | 0.0167*** |
|  | (0.0019) | (0.0019) | (0.0019) | (0.0019) | (0.0019) | (0.0019) |
|  | -0.0155*** | -0.0154*** | -0.0154*** | -0.0155*** | -0.0154*** | -0.0155*** |
|  | (0.0055) | (0.0055) | (0.0055) | (0.0055) | (0.0055) | (0.0055) |
|  | 0.0124*** | 0.0124*** | 0.0125*** | 0.0124*** | 0.0124*** | 0.0124*** |
|  | (0.0029) | (0.0029) | (0.0029) | (0.0029) | (0.0029) | (0.0029) |
|  | 0.0369*** | 0.0369*** | 0.0368*** | 0.0369*** | 0.0369*** | 0.0368*** |
|  | (0.0047) | (0.0047) | (0.0047) | (0.0047) | (0.0047) | (0.0047) |
|  | 0.8323*** | 0.8314*** | 0.8308*** | 0.8323*** | 0.8315*** | 0.8308*** |
|  | (0.2032) | (0.2032) | (0.2033) | (0.2032) | (0.2032) | (0.2033) |
|  | 0.0167 | 0.0168 | 0.0168 | 0.0167 | 0.0168 | 0.0168 |
|  | (0.0160) | (0.0160) | (0.0160) | (0.0160) | (0.0160) | (0.0160) |
| *Firm dummy* | Yes | Yes | Yes | Yes | Yes | Yes |
| *Year dummy* | Yes | Yes | Yes | Yes | Yes | Yes |
| Number of observations | 41,049 | 41,049 | 41,049 | 41,049 | 41,049 | 41,049 |
| Number of firms | 20,965 | 20,965 | 20,965 | 20,965 | 20,965 | 20,965 |

Notes: (1) Employee, sales, and total assets are employed to capture the spatial spillovers, respectively. (2) The inverse-haversine distance matrices of non-truncated and truncated forms at 100 km are used in Panels A and B, respectively. (3) ***, **, and * indicate statistical significance at the 1%, 5%, and 10% levels, respectively. (4) Robust standard errors are in parentheses.

Table A7: PSM details in placebo test 2

| Panel A: Logit model: I(O)FDI firms (Yes/No) | | |
| --- | --- | --- |
| Variable | IFDI | OFDI |
|  | (1) | (2) |
|  | 0.7384*** | 0.7407*** |
|  | (0.0202) | (0.0680) |
|  | 0.3092*** | 0.3231*** |
|  | (0.0170) | (0.0794) |
|  | 2.8774*** | 1.0783*** |
|  | (0.0628) | (0.2494) |
|  | 0.1304*** | 0.2998*** |
|  | (0.0243) | (0.1052) |
|  | -3.2794 | 0.1901 |
|  | (0.0733) | (0.2134) |
|  | 0.8978 | -11.5846 |
|  | (1.3646) | (11.4722) |
| *Industry* | Yes | Yes |
| *Region* | Yes | Yes |
| Number of firms | 41,217 | 23,385 |
| Pseudo- | 0.423 | 0.186 |
| Log likelihood | -11113.49 | -859.23 |
| Panel B：Number of firms | | |
| Number of treated firms | 7,293 | 180 |
| Number of untreated firms | 33,924 | 23,205 |
| Number of all firms | 41,217 | 23,385 |
| Panel C: Pseudo- Change before and after matching | | |
| Unmatched | 0.419 | 0.186 |
| Matched | 0.119 | 0.069 |

Notes: (1) The dataset used in PSM is converted from the panel dataset to a year-average dataset. (2) Industry and region dummies refer to 2-digit level industry and county-level region, respectively. (3) The one-to-one nearest neighbor matching technique is employed to conduct PSM. (4) Panel A shows the results of identifying IFDI and OFDI firms by using Logit models, respectively. (5) ***, **, and * indicate statistical significance at the 1%, 5%, and 10% levels, respectively. (6) Panel B show the number of treated (i.e., I(O)FDI firms) and untreated firms (non-I(O)FDI firms), respectively. (7) Panel C display Pseudo- changes of identifying I(O)FDI Logit models before and after matching. Obviously, the identified capability of Logit models to I(O)FDI firms have declined after matching.

Table A8: The results of placebo test 2 (fictitious I(O)FDI firms selected by PSM) and 3 (firms with randomized coordinates)

| Variable | Dependent variable: | | | | | |
| --- | --- | --- | --- | --- | --- | --- |
|  | Panel A: No truncated | | | Panel B: 100km | | |
|  | A-1 | A-2 | A-3 | B-1 | B-2 | B-3 |
|  | Employee | Sales | Assets | Employee | Sales | Assets |
| **Placebo test 2** |  |  |  |  |  |  |
|  | 0.0250 | 0.0133 | 0.0340 | 0.0251 | 0.0133 | 0.0346 |
|  | (0.0234) | (0.0132) | (0.0263) | (0.0235) | (0.0132) | (0.0266) |
|  | 0.0010 | 0.0148 | 0.0097 | 0.0007 | 0.0142 | 0.0094 |
|  | (0.0044) | (0.0099) | (0.0113) | (0.0044) | (0.0098) | (0.0112) |
| Number of observations | 41,049 | 41,049 | 41,049 | 41,049 | 41,049 | 41,049 |
| Number of firms | 20,965 | 20,965 | 20,965 | 20,965 | 20,965 | 20,965 |
| **Placebo test 3** |  |  |  |  |  |  |
|  | 0.0006 | -0.0005 | -0.0043 | 0.0010 | -0.0004 | -0.0040 |
|  | (0.0096) | (0.0012) | (0.0069) | (0.0096) | (0.0012) | (0.0069) |
|  | -0.0005 | 0.0012 | 0.0009 | 0.0003 | 0.0020 | 0.0016 |
|  | (0.0089) | (0.0102) | (0.0086) | (0.0089) | (0.0101) | (0.0085) |
| Number of observations | 41,049 | 41,049 | 41,049 | 41,049 | 41,049 | 41,049 |
| Number of firms | 20,965 | 20,965 | 20,965 | 20,965 | 20,965 | 20,965 |

Notes: (1) Employee, sales, and total assets are employed to capture the spatial spillovers, respectively. (2) The inverse-haversine distance matrices of non-truncated and truncated forms at 100 km are used in Panels A and B, respectively. (3) ***, **, and * indicate statistical significance at the 1%, 5%, and 10% levels, respectively. (4) Robust standard errors are in parentheses. (5) Other control variables are omitted in the table.


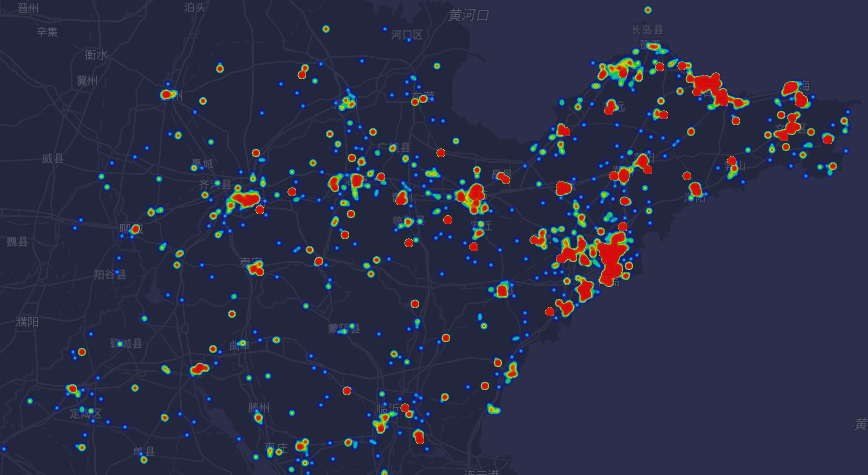


Figure A1: The spatial distribution of IFDI firms in Shandong Province, China, in 2007

Notes: (1) The darker color represents a higher proportion of IFDI in the region. (2) The map is a thermodynamic diagram, with 10km as the thermodynamic radius. (3) 6,080 IFDI firms are depicted in the map.


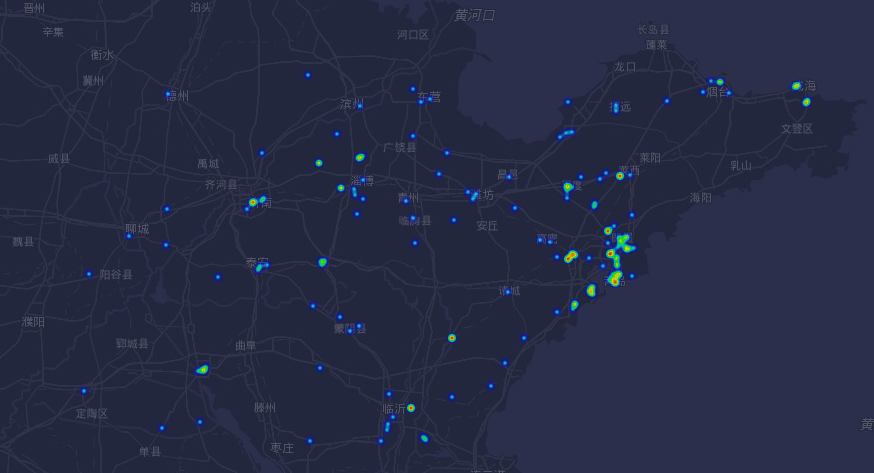


Figure A2: The spatial distribution of OFDI firms in Shandong Province, China, in 2007

Notes: (1) The darker color represents a higher proportion of OFDI in the region. (2) The map is a thermodynamic diagram, with 10km as the thermodynamic radius. (3) 172 OFDI firms are depicted in the map.
